# Supplementary material for: Imaging the pathoanatomy of amyotrophic lateral sclerosis in vivo: targeting a propagation-based biological marker
Source: PubMed Central journal article supplement — J Neurol Neurosurg Psychiatry. 2017 Nov 3;89(4):374–81. doi: 10.1136/jnnp-2017-316365 (PMC5869447; doi:10.1136/jnnp-2017-316365), 2017-11-03
Supplement: jnnp-2017-316365supp001.pdf [file jnnp-2017-316365supp001.pdf]

### A) Individual example, longitudinal development

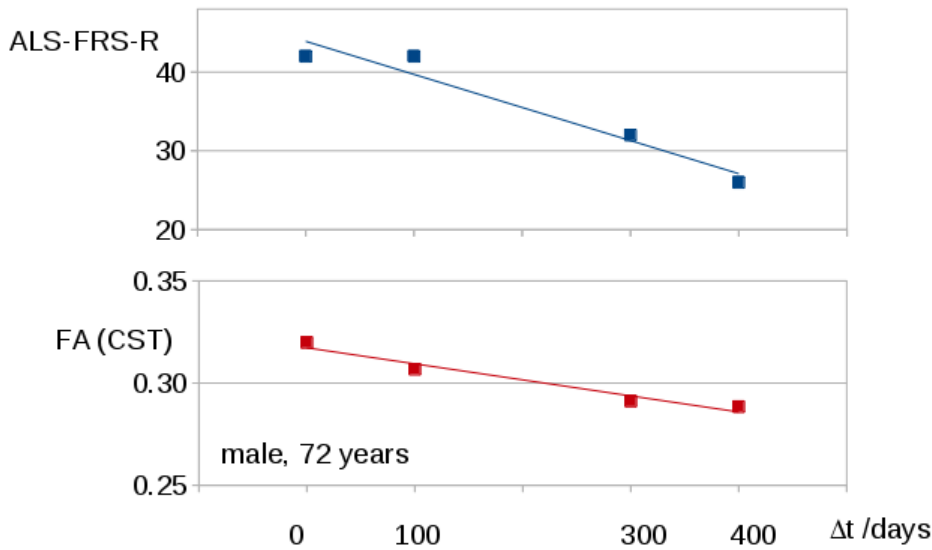

### B) Cross-sectional: correlation of ALS stages and clinical parameters

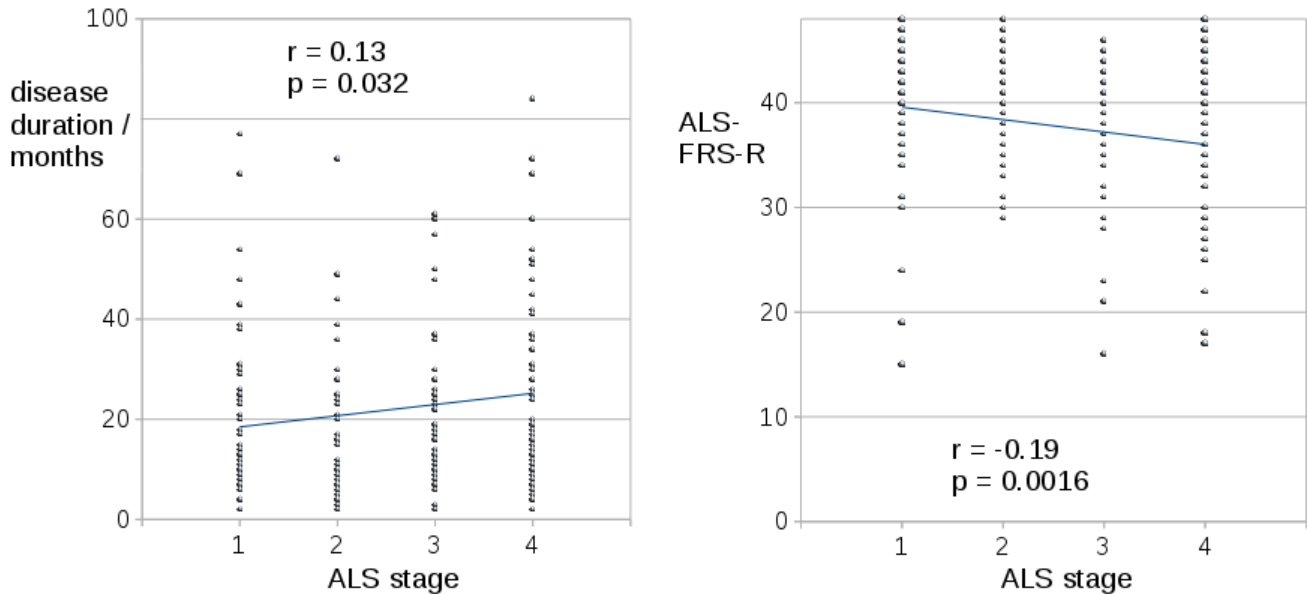

**Supplementary Figure 1. Relation to ALS-FRS-R and disease duration. (A)** Exemplary individual longitudinal development of ALS-FRS-R score and FA in the CST of a 72-year old male ALS patient. **(B)** Left - correlation of ALS stage and disease duration of 272 stageable ALS patients. Right - correlation of ALS stage and ALS-FRS-R of 272 stageable ALS patients.
