# Supplementary material for: Imaging the pathoanatomy of amyotrophic lateral sclerosis in vivo: targeting a propagation-based biological marker
Source: PubMed Central journal article supplement — J Neurol Neurosurg Psychiatry. 2017 Nov 3;89(4):374–81. doi: 10.1136/jnnp-2017-316365 (PMC5869447; doi:10.1136/jnnp-2017-316365), 2017-11-03
Supplement: jnnp-2017-316365supp002.pdf [file jnnp-2017-316365supp002.pdf]

## Significant voxelwise correlation of $\Delta$ FA and $\Delta$ ALS-FRS-R of 67 ALS patients

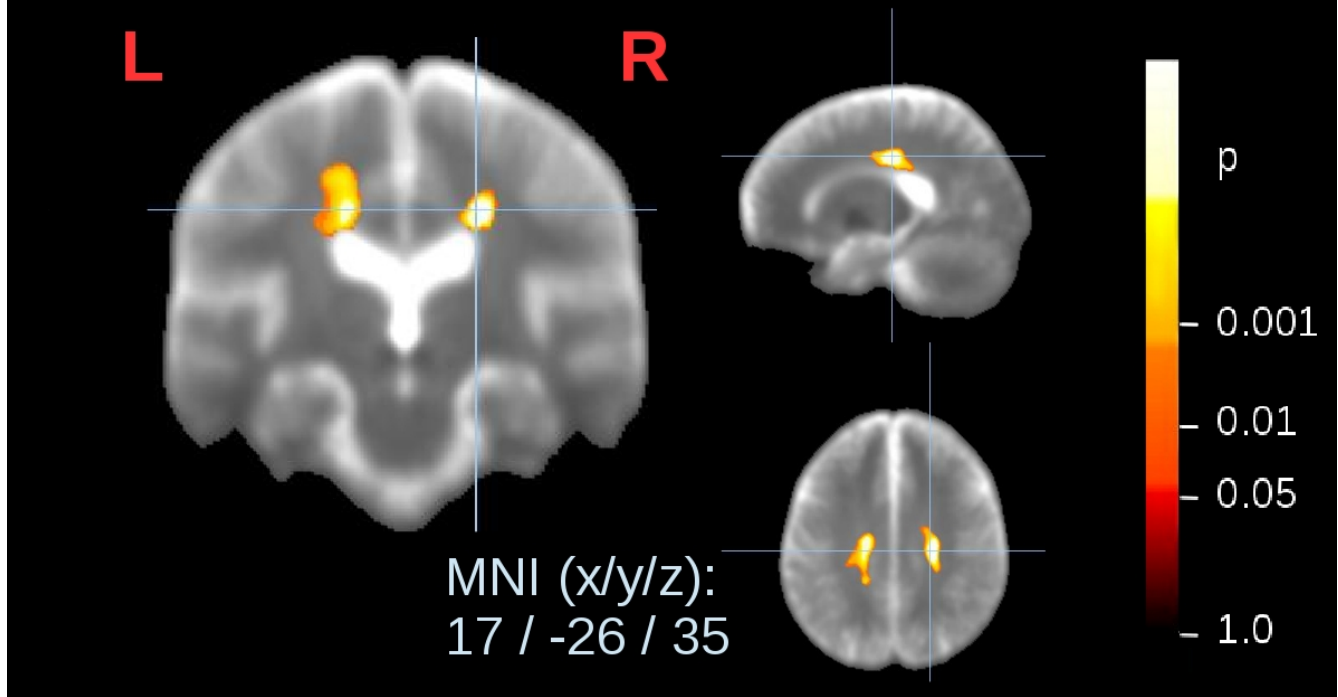

**Supplementary Figure 2.** Voxelwise Pearson correlation (FDR-corrected at  $p < 0.05$ ) of FA differences ( $\Delta$ FA) and ALS-FRS-R differences ( $\Delta$ ALS-FRS-R) revealed clusters in the left upper CST ( $p < 0.00001$ , MNI -22/-26/37, 4754 voxels) and in the right upper CST ( $p < 0.00001$ , MNI 17/-26/35, 2404 voxels).
