# Supplementary material for: Imaging the pathoanatomy of amyotrophic lateral sclerosis in vivo: targeting a propagation-based biological marker
Source: PubMed Central journal article supplement — J Neurol Neurosurg Psychiatry. 2017 Nov 3;89(4):374–81. doi: 10.1136/jnnp-2017-316365 (PMC5869447; doi:10.1136/jnnp-2017-316365), 2017-11-03
Supplement: jnnp-2017-316365supp003.pdf [file jnnp-2017-316365supp003.pdf]

|                              | <b>protocol A</b> | <b>protocol B</b> |
|------------------------------|-------------------|-------------------|
| B0 / T                       | 3.0               | 1.5               |
| no. of GD                    | 49                | 52                |
| no. of b = 0                 | 1                 | 4                 |
| b / s/mm <sup>2</sup>        | 1000              | 1000              |
| slices                       | 52                | 55                |
| in-plane matrix              | 96 x 128          | 128 x 128         |
| slice thickness / mm         | 2.2               | 2.8               |
| pixel size / mm <sup>2</sup> | 2.2 x 2.2         | 2.0 x 2.0         |
| TE                           | 85                | 95                |
| TR                           | 7600              | 8000              |

**Supplementary Table 1: Scan parameters for the different protocols.**
