# Supplementary material for: Imaging the pathoanatomy of amyotrophic lateral sclerosis in vivo: targeting a propagation-based biological marker
Source: PubMed Central journal article supplement — J Neurol Neurosurg Psychiatry. 2017 Nov 3;89(4):374–81. doi: 10.1136/jnnp-2017-316365 (PMC5869447; doi:10.1136/jnnp-2017-316365), 2017-11-03
Supplement: jnnp-2017-316365supp004.pdf [file jnnp-2017-316365supp004.pdf]

| tract                                     | Start seed          |                    | Target seed         |                    |
|-------------------------------------------|---------------------|--------------------|---------------------|--------------------|
|                                           | MNI (x/y/z) /<br>mm | ROI radius /<br>mm | MNI (x/y/z) /<br>mm | ROI radius /<br>mm |
| corticospinal tract                       | ±16/-19/6           | 5 mm               | ±17/-37/63          | 10 mm              |
| corticopontine tract                      | ±8/-24/-11          | 5 mm               | ±29/21/43           | 10 mm              |
| corticorubral tract                       | ±9/-9/-8            | 5 mm               | ±28/39/29           | 10 mm              |
| corticostriatal pathway                   | ±20/11/16           | 5 mm               | ±32/37/35           | 10 mm              |
| proximal portion of the<br>perforant path | ±25/-17/-24         | 5 mm               | ±22/-29/-18         | 10 mm              |
| optic tract                               | 0/-13/-32           | 5 mm               | ±20/-34/-40         | 10 mm              |

**Supplementary Table 2: Seeds for deterministic streamline fiber tracking.**
