# Supplementary material for: Imaging the pathoanatomy of amyotrophic lateral sclerosis in vivo: targeting a propagation-based biological marker
Source: PubMed Central journal article supplement — J Neurol Neurosurg Psychiatry. 2017 Nov 3;89(4):374–81. doi: 10.1136/jnnp-2017-316365 (PMC5869447; doi:10.1136/jnnp-2017-316365), 2017-11-03
Supplement: jnnp-2017-316365supp005.pdf [file jnnp-2017-316365supp005.pdf]

| <b>Cross-sectional analysis – FA</b>                 |                            |                                                   |                                 |                                       |
|------------------------------------------------------|----------------------------|---------------------------------------------------|---------------------------------|---------------------------------------|
|                                                      | <b>corticospinal tract</b> | <b>corticopontine tract / corticorubral tract</b> | <b>cortico-striatal pathway</b> | <b>perforant path (prox. portion)</b> |
| controls                                             |                            |                                                   |                                 |                                       |
| $\mu$                                                | 0.379                      | 0.380                                             | 0.307                           | 0.191                                 |
| $\sigma$                                             | 0.030                      | 0.019                                             | 0.031                           | 0.023                                 |
| threshold                                            | 0.365                      | 0.370                                             | 0.292                           | 0.180                                 |
| ALS                                                  |                            |                                                   |                                 |                                       |
| $\mu$                                                | 0.350                      | 0.352                                             | 0.287                           | 0.184                                 |
| $\sigma$                                             | 0.033                      | 0.031                                             | 0.038                           | 0.019                                 |
| p (ALS vs. controls)                                 | $2*10^{-18}$               | $2*10^{-28}$                                      | $1*10^{-9}$                     | $7*10^{-4}$                           |
| sensitivity                                          | 72 %                       | 72 %                                              | 55 %                            | 54 %                                  |
| specificity                                          | 67 %                       | 68 %                                              | 65 %                            | 63 %                                  |
| <b>Longitudinal analysis – <math>\Delta</math>FA</b> |                            |                                                   |                                 |                                       |
| controls                                             |                            |                                                   |                                 |                                       |
| $\mu$                                                | $2*10^{-6}$                | $-2*10^{-6}$                                      | $-2*10^{-6}$                    | $-4*10^{-6}$                          |
| $\sigma$                                             | $4*10^{-5}$                | $3*10^{-5}$                                       | $3*10^{-5}$                     | $5*10^{-5}$                           |
| ALS                                                  |                            |                                                   |                                 |                                       |
| $\mu$                                                | $-3*10^{-5}$               | $-4*10^{-5}$                                      | $-3*10^{-5}$                    | $-7*10^{-6}$                          |
| $\sigma$                                             | $5*10^{-5}$                | $6*10^{-5}$                                       | $7*10^{-5}$                     | $4*10^{-5}$                           |
| p (ALS vs. controls)                                 | $3*10^{-4}$                | $-9*10^{-4}$                                      | $-3*10^{-3}$                    | 0.9                                   |

**Supplementary Table 3: Cross-sectional and longitudinal comparison by TFAS analysis of data from ALS patients and controls.** Mean values, standard deviations and p-values. Longitudinal data are given as  $\Delta$ FA per day. FA-threshold calculation of data from controls.
